# Supplementary material
Source: Research Square preprint supplement (doi:10.21203/rs.3.rs-8885278/v1)
Supplement: Supplementary file 1 [file 4c8bca411fb99ddb99024416.docx]

| **TABLE 1: Baseline clinical, laboratory, echocardiographic, and procedural characteristics according to median RAVI/LAVI ratio** | | | |
| --- | --- | --- | --- |
| **Variable** | **Below Median(n=179)** | **Above Median(n=88)** | **p-value** |
| Age | 62,07(56-68) | 62,26(56,25-69) | 0,759 |
| Sex(male) | 136(76) | 63(71,6) | 0,440 |
| BMI | 28,14(23,9-32) | 27,79(24,8-30,62) | 0,702 |
| HT | 112(62,6) | 43(48,9) | 0,33 |
| DM | 116(64,8) | 46(52,3) | **0,049** |
| COPD | 20(11,2) | 13(14,8) | 0,402 |
| HL | 64(36) | 30(35,3) | 0,917 |
| CKD | 10(5,6) | 10(11,4) | 0,092 |
| AF | 6(3,4) | 3(3,4) | 0,981 |
| Beta Blocker | 71(39,7) | 27(30,7) | 0,153 |
| ACEi/ARB | 61(34,1) | 20(22,7) | 0,058 |
| Diuretic | 39(21,8) | 19(21,8) | 0,992 |
| Lactat | 16,1(10-19) | 17,18(11-18,25) | 0,899 |
| Creatinine | 0,97(0,77-1,01) | 0,96(0,75-1,06) | 0,565 |
| BNP | 987(76-674) | 690(52-602) | 0,702 |
| CRP | 18,09(1,49-16,49) | 16,31(1,2-15,7) | 0,996 |
| ESR | 28,6(12-37) | 29,6(11,5-40,75) | 0,881 |
| Troponin | 0,19(0,01-0,069) | 0,19(0,01-0,042) | 0,494 |
| CABG Procedure  Isolated CABG  Multivessel CABG(≥3grafts)  CABG+valve surgery | 171(95,2)  152(84,9)  8(4,8) | 80(91,2)  75(85,2)  8(8,8) | 0,442 |
| Left Atrial Volume | 87,62(72,9-102) | 60,76(49,6-72,6) | **0,001** |
| Right Atrial Volume (RAVI) | 56,06(44,9-66,2) | 74,4(62,9-86,9) | **0,001** |
| Left Atrial Volume Index (LAVI) | 45,88(38,4-54,6) | 31,25(24,4-38,6) | **0,001** |
| Right Atrial Volume Index | 29,16(23,5-33,9) | 38,19(32,47-44,55) | **0,001** |
| Pulmonary Artery Systolic Pressure mmhg | 29,04(23,7-33,6) | 24,99(20,1-39,4) | **0,001** |
| RAVI/LAVİ ratio | 0,655(0,548-0,780) | 1,29(1,01-1,40) | **0,001** |
| 2- month all-cause mortality | 23(12,8) | 31(35,2) | **0,001** |
| Length of hospital stay | 11,45(7-13) | 24,94(15-33,5) | **0,001** |

| **Table 2. Baseline Characteristics According to 2- Month All-Cause Mortality** | | | |
| --- | --- | --- | --- |
| **Variable** | **Alive (n=213)%** | **Death (n=54)%** | **p-value** |
| Age | 62,29(56-68,5) | 61,54(57,5-68) | 0,647 |
| Sex(male) n(%) | 159(74,6) | 40(74,1) | 0,931 |
| BMI | 28,3(24,5-31,7) | 26,93(23,8-30,8) | 0,076 |
| HT n(%) | 125(58,7) | 30(55,6) | 0,678 |
| DM n(%) | 129(60,6) | 33(61,1) | 0,941 |
| COPD n(%) | 26(12,2) | 7(13,0) | 0,880 |
| HL n(%) | 72(34,8) | 22(41,5) | 0,328 |
| CKD n(%) | 14(6,6) | 6(11,1) | 0,259 |
| AF n(%) | 8(3,8) | 1(1,9) | 0,489 |
| Beta Blocker use n(%) | 82(38,5) | 16(29,6) | 0,228 |
| ACEi/ARB use n(%) | 63(29,6) | 18(33,3) | 0,592 |
| Diuretic use n(%) | 49(23,1) | 9(16,7) | 0,307 |
| Lactat | 16,8(10-19) | 15,09(11-17) | 0,626 |
| Creatinine | 0,97(0,77-1,03) | 0,96(0,70-1,05) | 0,466 |
| BNP | 937(75-679) | 669(56-575) | 0,722 |
| CRP | 18,1(1,48-16,1) | 14,9(0,87-19,6) | 0,314 |
| ESR | 28,9(11,5-36,5) | 29,1(15,2-40) | 0,293 |
| Troponin | 0,20(0,01-0,07) | 0,13(0,009-0,042) | 0,144 |
| CABG Procedure  Isolated CABG  Multivessel CABG(≥3grafts)  CABG+valve surgery | 24  175  14 | 7  45  2 | 0,760 |
| Left Atrial Volume | 80,2(67,1-93,9) | 72,9(53,5-93,9) | **0,040** |
| Right Atrial Volume (RAVI) | 60,5(49,7-72,1) | 68,0(52,4-80,2) | **0,009** |
| Left Atrial Volume Index (LAVI) | 41,8(33,3-49,4) | 38(28,4-49,1) | **0,036** |
| Right Atrial Volume Index | 31,3(25-37,6) | 35,1(27,8-42,1) | **0,006** |
| Pulmonary Artery Systolic Pressure mmhg | 28,0(22,3-32,1) | 26,33(21,6-30,3) | **0,091** |
| RAVI/LAVİ ratio | 0,829(0,575-0,953) | 1,01(0,74-1,020) | **<0,001** |
| Length of hospital stay (day) | 11,8(8-13,5) | 32,0(25-40,2) | **<0,001** |

| **Table 3: Multivariable logistic regression model evaluating predictors of 2-month all-cause mortality** | | | | |
| --- | --- | --- | --- | --- |
| **Variable** | **β coefficient** | **OR (95% CI)** | **Wald χ²** | ***p* value** |
| **RAVI/LAVI ratio (per 1 unit)** | 1.894 | **6.67 (1.96–22.73)** | 9.25 | **0.002** |
| Sex (female ) | -0.604 | 0.55 (0.27-1.10) | 2.87 | **0.09** |
| Age (per year) | 0.002 | 1.002 (0.96-1.03) | 0.011 | 0.917 |
| DM | -0.314 | 0.73 (0.42-1.27) | 1.46 | 0.227 |
| CKD | -0.753 | 0.47 (0.18-1.19) | 2.57 | 0.109 |
| PAPS (mmHg) | 0.300 | 1.35 (0.97-2.03) | 1.27 | 0.260 |
